1 **Title page:**

2 **Full Title: Prevalence and associated factors of gender-based violence for female: Evidence**  
3 **from school students in Nepal- a cross sectional study**

4 **Short title: Prevalence and associated factors of gender-based violence for female in Nepal**

5 **Authors**

6 Laxmi Gautam<sup>1</sup>, Manisha Sha<sup>1</sup>, Durga Khadka Mishra<sup>2</sup>, Padam Kanta Dahal<sup>3</sup>, Sujan Gautam<sup>1</sup>

7 **Affiliations**

8 <sup>1</sup>Department of Public Health, Manmohan Memorial Institute of Health Sciences, Kathmandu,  
9 Nepal

10 <sup>2</sup>Madan Bhandari Academy of Health Sciences, Hetauda, Nepal

11 <sup>3</sup>School of Health, Medical and Applied Sciences, Central Queensland University, Sydney  
12 Campus, NSW, Australia

13

14 **Corresponding author**

15 Name: Laxmi Gautam: [laxmi.dp26@gmail.com](mailto:laxmi.dp26@gmail.com)/[45laxmigautam@gmail.com](mailto:45laxmigautam@gmail.com) (LG)

16 Affiliation: Department of Public Health, Manmohan Memorial Institute of Health Sciences,  
17 Kathmandu, Nepal

18

19

20

## 21 **Abstract**

22 **Background:** Gender-based violence (GBV) is a major global public health challenge in 21<sup>st</sup>  
23 century that remains a serious impact on women's health and well-being. Therefore, this study  
24 aimed to access the prevalence and factors associated with GBV among secondary school female  
25 students in Sarlahi district of Nepal.

26 **Methods:** Using a cross-sectional study, we collected data from 225 secondary school female  
27 students in Sarlahi district of Nepal. Data was collected by using a semi-structured, self-  
28 administered questionnaire. Probability proportionate and simple random sampling techniques  
29 were used for sampling. The association were explored by using chi-square test and binary logistic  
30 regression where a p value <0.05 was considered statistically significant.

31 **Results:** The prevalence of GBV among the students during their lifetime was 45.33% followed  
32 by physical (16.89%), sexual (30.22%) and psychological (39.56%) violence respectively. The  
33 prevalence of physical violence from family members was 97.36%, followed by emotional  
34 violence (41.57%). Further, the prevalence of sexual violence from the non-family members was  
35 91.17%. Type of family had a significant association with lifetime experience of GBV (p=0.003).  
36 Gender based discrimination in the family had a significant association with lifetime (p=0.001) as  
37 well as last 12 months (p=0.001) GBV experience. Experience of witnessing physical violence as  
38 a child was within last 12 months was associated with GBV (p=0.03).

39 **Conclusion:** GBV has been prevalent among the high school students, with limited level of  
40 awareness in that issue. This warrants the urgent need to establish preventive and responsive  
41 control measure within schools and communities to address the GBV effectively.

42  
43 **Key words:** *Gender-based violence, secondary school female students, sexual violence, physical*  
44 *violence, emotional violence*

45

46

47

48

49

## 50 Introduction

51 Gender-based violence (GBV) remains one of the most serious social, legal and health  
52 challenges for the 21<sup>st</sup> century. It is a major public health problem and human right concern  
53 throughout the world which has a serious impact on women's health and well-being.<sup>(1)</sup> GBV or  
54 violence against women and girls (VAWG), is a global pandemic that affects 1 in 3 women in their  
55 lifetime and 35% of women worldwide have experienced either physical and/or sexual intimate  
56 partner violence or non-partner sexual violence. Further, world health organization (WHO)  
57 estimated that 1 in 5 women between 15-24 years could subject to GBV from their intimate  
58 partners while 40.2% of all women experience physical and/or sexual intimate partner or non-  
59 partner violence in their lifetime in southeast Asia.<sup>(2)</sup> (REF) Studies in India<sup>(3)</sup>, Pakistan<sup>(4)</sup> and  
60 Maldives<sup>(5)</sup> revealed that 79.6%, 38.40% and 34.6% respectively.

61 In Nepal, the prevalence of GBV is rapidly increased over few decades which has created a serious  
62 impact in the health and well-being of females. Evidence shows that over 150 females were killed  
63 as a result of GBV in 2017, highlighted the major perpetrator was family member or relatives.<sup>(6)</sup>  
64 Further, another study conducted among community people in Kathmandu, Lalitpur, Bhaktapur,  
65 and Nuwakot districts in 2018 showed 11.3% respondent experience GBV in past 12 months of  
66 survey.<sup>(7)</sup> Nepal Demographic Health Survey in 2022 showed that 23% of women in aged 15–49  
67 have experienced physical violence since age of 15 and 8% which is a percentage higher compared  
68 to 2016 estimates.<sup>(8),(9)</sup>

69 GBV occurs as a result of the normative role expectations associated with each gender and unequal  
70 power relationships within the context of a specific society. Domestic violence, marital rape,  
71 dowry-related violence, child marriage, polygamy, female infanticide, witchcraft accusations,  
72 chhaupadi, trafficking of women and girls for sexual exploitation are common types of GBV in  
73 Nepal.<sup>(10)</sup> Furthermore, patriarchal attitudes and deep-rooted stereotypes that discriminate against  
74 women remain entrenched in the social, cultural, religious, socio-economic and political  
75 institutions. However, studies are lacking to estimate the prevalence of gender-based violence on  
76 the school level in low and middle-income countries like Nepal and insufficient for designing the  
77 responsive control intervention to fight against the problem. Therefore, this study aimed to assess  
78 the prevalence and factor associated with gender-based violence among secondary school's female  
79 students.

80

## 81 **Materials and Methods**

### 82 **Study design and population**

83 A cross-sectional study was conducted from October 2020 to January 2021 among female  
84 students of grade 9 to 12 in Brahmpuri Rural Municipality of Sarlahi district, Nepal. A sample of  
85 225 participant was estimated using Cochran's formula with reference of prevalence of GBV  
86 (Prevalence =48%) from a study conducted by Government of Nepal<sup>(11)</sup> at 5% allowable error  
87 and 10% non-response rate. Two schools were selected using simple random sampling and  
88 probability proportionate allocation (PPA) was used to select the study population. Pretested semi-  
89 structured questionnaire were provided for self-administration. Information about socio-  
90 demographic status, violence related exposure and experience along with prevalence of GBV in  
91 lifetime and last 12 months preceding survey were collected. In addition, the study was adhered to  
92 the Strengthening the Reporting of Observational Studies in Epidemiology (STROBE) guidelines  
93 for reporting observational studies

94

### 95 **Outcome measures**

96 Gender-based violence was the major outcome of this study including the prevalence of  
97 physical, Sexual and Psychological violence. In this study physical violence includes if the  
98 respondents reported to have experienced slapping, punching, kicking/dragging, beating/hitting  
99 with any object, cutting/ biting, shaking, shoving, pushing, throwing, and burning/chocking  
100 against them. Similarly for sexual violence it was considered if the respondent had experienced  
101 unwanted or non-consensual sexual act through force or threat against them. In case of  
102 psychological violence if there was systemic destruction of women's or girl's self-esteem and/or  
103 sense of safety ten it was considered as violence against them which included humiliation, being  
104 made to feel unwanted, forced isolation from family or friends, threats to harm the individual or  
105 someone they care about, repeated yelling or degradation, inducing fear through intimidating  
106 words or gestures, controlling behavior, and the destruction of possessions. To measure these  
107 experiences different questions were developed based on the reference provided by WHO,  
108 UNICEF and UN women and were modified to make applicable in local context of the

109 respondents. The Prevalence of GBV was measured if the respondents had experiences any type  
110 of physical, sexual, psychological violence that targets them.

### 111 **Statistical analyses**

112 The frequency, percentage, mean and standard deviation were reported for each variable.  
113 The association between dependent and independent variables were determined by chi-square test  
114 and binary logistic regression. Bivariate and multivariate analyses were conducted and the  
115 association were tested for different independent variables with the experience of violence in  
116 lifetime and last 12 months of the survey. The probability value less than 0.05 was considered to  
117 be significant. Microsoft excel was used for data cleaning and coding and statistical package of  
118 social science (SPSS) version 16 was used for statistical analyses.

### 119 **Ethical Statement:**

120 Ethical approval was received from institutional review committee (IRC) of Manmohan  
121 Memorial Institute of Health Sciences (MMIHS-IRC 77/13). Study was conducted from October  
122 2020 to January 2021. Further, permission was taken from each school and municipality before  
123 the information collection. Written informed consent was consent was taken from participants after  
124 explaining purpose of the study prior to the data collection. In case of participants below the age  
125 of 18 years, permission was taken from school principle, respective class teachers and then assent  
126 was taken from them. Participants were informed about privacy and confidentiality of information  
127 as well as the right of withdrawal and right of refusal. All other ethical guidelines were followed  
128 throughout the process of this study.

129

## 130 **Results**

131 The mean age of respondents was  $17.17 \pm 2.48$  years with more than two third of them were  
132 from age group 15-20 years. Father and grandfather were the major decision makers of their  
133 family. Alcohol and drugs abusers in the family were reported by more than one third respondents.  
134 Most of the respondents need permission from family to go to health institution while more than a  
135 quarter (28.4%) faced discrimination in comparison to their male counterparts. Almost 30%  
136 responded had experienced witnessed GBV as a child, followed by sexual (10.7%) and physical  
137 violence (8.9%) (**Table 1**).

138

139 **Table 1: Socio-demographic information and Bivariate analysis GBV ever among the**  
 140 **respondents**

| Variables                              | GBV ever   |            | Total      | P value |
|----------------------------------------|------------|------------|------------|---------|
|                                        | Yes (%)    | No (%)     |            |         |
| Age in years                           |            |            |            |         |
| <15                                    | 25 (60.98) | 16 (39.02) | 41 (18.2)  | 0.001   |
| 15-20                                  | 90 (59.2)  | 62 (40.8)  | 152 (67.6) |         |
| >20                                    | 8 (25.0)   | 24 (75.0)  | 32 (14.2)  |         |
| Religion                               |            |            |            |         |
| Hindu                                  | 75 (39.7)  | 114 (60.3) | 189 (84.0) | <0.001  |
| Other than Hindu                       | 27 (75.0)  | 9 (25.0)   | 36 (16.0)  |         |
| Type of Family                         |            |            |            |         |
| Nuclear family                         | 46 (36.5)  | 80 (63.5)  | 126 (56.0) | 0.003   |
| Joint family and extended              | 56 (56.6)  | 43 (43.4)  | 99 (44.0)  |         |
| Living status of Parents               |            |            |            |         |
| Together                               | 65 (35.5)  | 118 (64.5) | 183 (81.3) | <0.001  |
| Separately                             | 37 (88.1)  | 5 (11.9)   | 42 (18.7)  |         |
| Educational status of father (n=222)   |            |            |            |         |
| Higher Education (bachelors and above) | 1 (10.0)   | 9 (90.0)   | 10 (4.5)   | <0.001  |
| Secondary Education (9-12)             | 14 (18.7)  | 61 (81.3)  | 75 (33.8)  |         |
| Primary Education (1-8)                | 47(55.3)   | 38 (44.7)  | 85 (38.3)  |         |
| Literate (able to read and write)      | 17 (60.7)  | 11 (39.3)  | 28 (12.6)  |         |
| Illiterate (unable to read or write)   | 20 (83.3)  | 4 (16.7)   | 24 (10.8)  |         |
| Educational status of Mother (n=219)   |            |            |            |         |
| Secondary Education (9-12)             | 5 (31.3)   | 11 (68.8)  | 16 (7.3)   | <0.001  |
| Primary Education (1-8)                | 14 (18.7)  | 61 (81.3)  | 75 (34.2)  |         |
| Literate (able to read or write)       | 28 (48.3)  | 30 (51.7)  | 58 (26.5)  |         |
| Illiterate (unable to read or write)   | 49 (70.0)  | 21 (30.3)  | 70 (32.0)  |         |
| Decision maker of the family           |            |            |            |         |
| Father/Grandfather                     | 83 (41.3)  | 118 (58.7) | 201 (89.3) | 0.002   |
| Mother/Grandmother                     | 11 (73.3)  | 4 (26.7)   | 15 (6.7)   |         |
| Others                                 | 8 (88.9)   | 1 (11.1)   | 9 (4.0)    |         |
| Alcohol or drugs abuser in the family  |            |            |            |         |
| No                                     | 36 (26.1)  | 102 (73.9) | 138 (61.3) | <0.001  |
| Yes                                    | 66 (75.9)  | 21 (24.1)  | 87 (38.7)  |         |

|                                                                         |            |            |            |        |
|-------------------------------------------------------------------------|------------|------------|------------|--------|
| Need permission from family members to visit health center or hospital  |            |            |            |        |
| No                                                                      | 0 (0)      | 4 (100)    | 4 (1.8)    | 0.066  |
| Yes                                                                     | 102 (46.2) | 119 (53.8) | 221 (98.2) |        |
| Discriminate between men and women in family or treats them differently |            |            |            |        |
| No                                                                      | 48 (29.8)  | 113 (70.2) | 161 (71.6) | <0.001 |
| Yes                                                                     | 54 (84.4)  | 10 (15.6)  | 64 (28.4)  |        |
| Experience of Witnessing GBV as a child (n=218)                         |            |            |            |        |
| No                                                                      | 51 (32.9)  | 104 (67.1) | 155 (71.1) | <0.001 |
| Yes                                                                     | 47 (74.6)  | 16 (25.4)  | 63 (28.9)  |        |
| Experience of witnessing physical violence as a child                   |            |            |            |        |
| No                                                                      | 84 (40.8)  | 122 (59.2) | 205 (91.1) | <0.001 |
| Yes                                                                     | 18 (94.7)  | 1 (5.3)    | 20 (8.9)   |        |
| Experience of witnessing sexual violence as a child                     |            |            |            |        |
| No                                                                      | 79 (39.3)  | 122 (60.7) | 201 (89.3) | <0.001 |
| Yes                                                                     | 23 (95.8)  | 1 (4.2)    | 24 (10.7)  |        |

141  
 142 Regarding the GBV with in last 12 months preceding the survey, age and prevalence of violence  
 143 had a direct association. Similarly, GBV was experienced more in joint family, and was  
 144 significantly associated with those whose parents were separated, educational status of parents,  
 145 existence of alcohol or drugs abuser in the family, discriminate between men and women in family,  
 146 and experience of witnessing GBV as a child in last 12 months before the survey (**Table 2**).

147 **Table 2: Bivariate analysis GBV within last 12 months preceding the survey**

| Background variables | GBV 12 months |            | Total      | P value |
|----------------------|---------------|------------|------------|---------|
|                      | Yes (%)       | No (%)     |            |         |
| Age                  |               |            |            |         |
| <15                  | 10 (24.4)     | 31 (75.6)  | 41 (18.2)  | 0.005   |
| 15-20                | 50 (32.9)     | 102 (67.1) | 152 (67.6) |         |
| >20                  | 19 (59.4)     | 13 (40.6)  | 32 (14.2)  |         |
| Religion             |               |            |            |         |
| Hindu                | 59 (31.2)     | 130 (68.8) | 189 (84.0) | 0.005   |

|                                                                               |              |            |            |        |
|-------------------------------------------------------------------------------|--------------|------------|------------|--------|
| Others than Hindu                                                             | 20<br>(55.6) | 16 (44.4)  | 36 (16.0)  |        |
| <b>Type of family</b>                                                         |              |            |            |        |
| Nuclear family                                                                | 32<br>(25.4) | 94 (74.6)  | 126 (56.0) | 0.001  |
| Joint family and extended                                                     | 47<br>(47.5) | 52 (52.5)  | 99 (44.0)  |        |
| <b>Living status of Parents</b>                                               |              |            |            |        |
| Together                                                                      | 49<br>(26.8) | 134 (73.2) | 183 (81.3) | <0.001 |
| Separately                                                                    | 30<br>(71.4) | 12 (28.6)  | 42 (18.7)  |        |
| <b>Education of Father++ (n=222)</b>                                          |              |            |            |        |
| Illiterate (unable to read or write)                                          | 16<br>(66.7) | 8 (33.3)   | 24 (10.8)  |        |
| Literate (able to read or write)                                              | 15<br>(53.6) | 13 (46.4)  | 28 (12.6)  | <0.001 |
| Primary Education (1-8)                                                       | 39<br>(45.9) | 46 (54.1)  | 85 (38.3)  |        |
| Secondary Education (9-12)                                                    | 8 (10.7)     | 67 (89.3)  | 75 (33.8)  |        |
| Higher Education (bachelors and above)                                        | 0 (0)        | 10 (100)   | 10 (4.5)   |        |
| <b>Education of mother (n=219)</b>                                            |              |            |            |        |
| Secondary Education (9-12)                                                    | 1 (6.3)      | 15 (93.8)  | 16 (7.3)   |        |
| Primary Education (1-8)                                                       | 11<br>(14.7) | 64 (85.3)  | 75 (34.2)  | <0.001 |
| Literate (able to read or write)                                              | 23<br>(39.7) | 35 (60.3)  | 58 (26.5)  |        |
| Illiterate (unable to read or write)                                          | 39<br>(55.7) | 31 (44.3)  | 70 (32.0)  |        |
| <b>Decision maker in the family</b>                                           |              |            |            |        |
| Father/Grandfather                                                            | 64<br>(31.8) | 137 (68.2) | 201 (89.3) | 0.006  |
| Mother/Grandmother                                                            | 8 (53.3)     | 7 (46.7)   | 15 (6.7)   |        |
| Others                                                                        | 7 (77.8)     | 2 (22.2)   | 9 (4.0)    |        |
| <b>Alcohol or drugs abuser in the family</b>                                  |              |            |            |        |
| No                                                                            | 55<br>(63.2) | 32 (36.8)  | 87 (38.7)  | <0.001 |
| Yes                                                                           | 24<br>(17.4) | 114 (82.6) | 138 (61.3) |        |
| <b>Need permission from family members to visit health center or hospital</b> |              |            |            |        |
| No                                                                            | 0 (0.0)      | 4 (100)    | 4 (1.8)    | 0.138  |
| Yes                                                                           | 79<br>(35.7) | 142 (64.3) | 221 (98.2) |        |



|                                                                         |              |            |            |        |
|-------------------------------------------------------------------------|--------------|------------|------------|--------|
| Discriminate between men and women in family or treats them differently |              |            |            |        |
| No                                                                      | 34<br>(21.1) | 127 (78.9) | 161 (71.6) | <0.001 |
| Yes                                                                     | 45<br>(70.3) | 19 (29.7)  | 64 (28.4)  |        |
| Experience of Witnessing GBV as a child (n=218)                         |              |            |            |        |
| No                                                                      | 39<br>(61.9) | 24 (38.1)  | 63 (28.9)  | <0.001 |
| Yes                                                                     | 37<br>(23.9) | 118 (76.1) | 155 (71.1) |        |
| Experience of witnessing physical violence as a child                   |              |            |            |        |
| No                                                                      | 15<br>(78.9) | 4 (21.1)   | 20 (8.9)   | <0.001 |
| Yes                                                                     | 64<br>(31.1) | 142 (68.9) | 205 (91.1) |        |
| Experience of witnessing sexual violence as a child                     |              |            |            |        |
| No                                                                      | 18<br>(75.0) | 6 (25.0)   | 24 (10.7)  | <0.001 |
| Yes                                                                     | 61<br>(30.3) | 140 (69.7) | 201 (89.3) |        |

148 ++: Cannot be computed because of zero value in one of the cells (None of the students reported having  
 149 experience 12 months GBV whose father had university level of education)  
 150

151 GBV in lifetime was 4.68 (1.69-12.95) times more likely to happen among respondents aged more  
 152 than 20 compared to < 15 years age group. Similarly, there was 4.56 (2.03-10.23) times more likely  
 153 to face GBV by non-Hindu by religion in comparison to Hindu respondents. Respondents whose  
 154 parents were not living together were likely to face GBV 13.43 (5.03-35.85) times than those  
 155 whose parents were living together. The higher the education of parents the lesser the chances of  
 156 facing GBV. The alcohol or drugs abuser in family was also contributed to increase the likelihood  
 157 of GBV by 8.91 (4.78-16.57) times and discrimination on family among men and women by 12.71  
 158 (5.97-27.03) times. Regarding the childhood experience of witnessing violence, those who had  
 159 witness GBV were 5.99 (3.01-11.57) times more at odd of facing GBV later. In case of GBV 12  
 160 months preceding survey, odd of facing GBV was increasing along with the age, was more among  
 161 religion other than Hindu and more among joint family compared to nuclear family. Those  
 162 respondents whose parents were not together were more at risk of facing GBV (6.84 (3.24-14.40))  
 163 than those whose parents were living together. Alcohol or drugs abuser in family had increased

164 the odd of GBV by 8.16 (4.39-15.16) times similarly those respondents who faced discrimination  
 165 in family were 8.08 (4.58-17.05) times more likely to face GBV compared to those who didn't face  
 166 discrimination within 12 months prior to the survey. Type of family had significant association  
 167 with lifetime experience of GBV (p=0.02) while living status of parents was associated with 12  
 168 months experience of GBV (p=0.02) and decision maker in family was associated with both.  
 169 Discriminate between men and women in family had significant association with lifetime and 12  
 170 months GBV experience (p=0.01 and p=0.001) (Table 3).

171 **Table 3: Multivariate GBV ever and within last 12 Months**

| Variables                            | Experiencing GBV ever |         |                     |         | Experiencing GBV 12 months |         |                   |         |
|--------------------------------------|-----------------------|---------|---------------------|---------|----------------------------|---------|-------------------|---------|
|                                      | COR (95% CI)          | p-value | AOR (95% CI)        | p-value | COR (95% CI)               | p-value | AOR (95% CI)      | p-value |
| <b>Age</b>                           |                       |         |                     |         |                            |         |                   |         |
| <15                                  | Ref                   |         |                     |         | Ref                        |         |                   |         |
| 15-20                                | 1.07 (0.53-2.18)      | 0.838   | 0.60 (0.20-1.78)    | 0.36    | 1.52 (0.69-3.34)           | 0.299   | 1.60 (0.49-5.26)  | 0.43    |
| >20                                  | 4.68 (1.69-12.95)     | 0.003   | 0.52 (0.08-3.24)    | 0.49    | 4.53 (1.66-12.35)          | 0.003   | 1.33 (0.26-6.72)  | 0.73    |
| <b>Religion</b>                      |                       |         |                     |         |                            |         |                   |         |
| Hindu                                | Ref                   |         | Ref                 |         | Ref                        |         | Ref               |         |
| Others than Hindu                    | 4.56 (2.03-10.23)     | 0.005   | 3.41 (0.69-16.94)   | 0.13    | 2.75 (1.33-5.69)           | 0.006   | 0.82 (0.21-3.26)  | 0.78    |
| <b>Type of family</b>                |                       |         |                     |         |                            |         |                   |         |
| Nuclear family                       | Ref                   |         | Ref                 |         | Ref                        |         | Ref               |         |
| Joint family and extended            | 2.26 (1.32-3.87)      | 0.003   | 0.28 (0.09-0.82)    | 0.02    | 2.65 (1.51-4.66)           | 0.001   | 0.43 (0.15-1.26)  | 0.12    |
| <b>Living status of Parents</b>      |                       |         |                     |         |                            |         |                   |         |
| Together                             | Ref                   |         | Ref                 |         | Ref                        |         | Ref               |         |
| Separately                           | 13.43 (5.03-35.85)    | <0.001  | 8.493 (2.09-34.456) | 0.003   | 6.84 (3.24-14.40)          | <0.001  | 4.45 (1.48-13.99) | 0.008   |
| <b>Education of Father++ (n=222)</b> |                       |         |                     |         | NA                         | NA      |                   |         |
| Higher Education                     | Ref                   |         | Ref                 |         |                            |         |                   |         |

|                                       |                             |        |                        |      |                        |        |                        |      |   |
|---------------------------------------|-----------------------------|--------|------------------------|------|------------------------|--------|------------------------|------|---|
| (bachelors and above)                 |                             |        |                        |      |                        |        |                        |      |   |
| Secondary Education (9-12)            | 2.066<br>(0.24-17.66)       | 0.025  | 0.23 (0.01-5.33)       | 0.36 | -                      | -      | -                      | -    | - |
| Primary Education (1-8)               | 11.13<br>2<br>(1.35-9.79)   | 0.019  | 0.33 (0.01-8.17)       | 0.50 | -                      | -      | -                      | -    | - |
| Literate (able to read or write)      | 13.90<br>9<br>(1.54-125.69) | 0.001  | 0.51 (0.01-14.6)       | 0.69 | -                      | -      | -                      | -    | - |
| Illiterate (unable to read or write)  | 45.00<br>0<br>(4.38-461.69) | <0.001 | 0.48 (0.01-16.97)      | 0.68 | -                      | -      | -                      | -    | - |
| Education of mother (n=219)           |                             |        |                        |      |                        |        |                        |      |   |
| Secondary Education (9-12)            | Ref                         |        | Ref                    |      | Ref                    |        | Ref                    |      |   |
| Primary Education (1-8)               | 0.505<br>(0.15-1.68)        | 0.230  | 0.30 (0.03-2.47)       | 0.81 | 2.578<br>(0.30-21.54)  | 0.032  | 1.10<br>(0.07-17.18)   | 0.94 | 6 |
| Literate (able to read or write)      | 2.053<br>(0.63-6.65)        | 0.006  | 0.75 (0.07-7.26)       | 0.71 | 9.857<br>(1.21-79.81)  | 0.006  | 3.59<br>(0.24-53.37)   | 0.35 | 2 |
| Illiterate (unable to read or write)  | 5.133<br>(1.58-16.61)       | <0.001 | 1.60 (0.13-18.36)      | 0.16 | 18.87<br>(2.36-150.81) | <0.001 | 6.32<br>(0.40-99.75)   | 0.19 | 0 |
| Decision maker in the family          |                             |        |                        |      |                        |        |                        |      |   |
| Father/Grandfather                    | Ref                         |        | Ref                    |      | Ref                    |        | Ref                    |      |   |
| Mother/Grandmother                    | 3.910<br>(1.20-12.70)       | 0.023  | 17.36<br>(2.95-102.13) | 0.00 | 2.24<br>(0.85-7.03)    | 0.097  | 9.17<br>(1.76-47.58)   | 0.00 | 8 |
| Others                                | 11.37<br>3<br>(1.39-92.66)  | 0.023  | 9.10 (0.33-249.96)     | 0.19 | 7.49<br>(1.51-37.08)   | 0.14   | 17.33<br>(1.14-268.41) | 0.04 | 0 |
| Alcohol or drugs abuser in the family |                             |        |                        |      |                        |        |                        |      |   |
| No                                    | Ref                         |        | Ref                    |      | Ref                    |        | Ref                    |      |   |

|                                                                         |                                |            |                            |      |                           |            |                           |           |
|-------------------------------------------------------------------------|--------------------------------|------------|----------------------------|------|---------------------------|------------|---------------------------|-----------|
| Yes                                                                     | 8.91<br>(4.78-<br>16.57)       | <0.00<br>1 | 1.88 (0.63-<br>5.64)       | 0.26 | 8.16<br>(4.39-<br>15.16)  | <0.00<br>1 | 1.88<br>(0.65-<br>5.40)   | 0.24      |
| Discriminate between men and women in family or treats them differently |                                |            |                            |      |                           |            |                           |           |
| No                                                                      | Ref                            |            | Ref                        |      | Ref                       |            | Ref                       |           |
| Yes                                                                     | 12.71<br>(5.97-<br>27.03)      | <0.00<br>1 | 4.83 (1.48-<br>15.66)      | 0.01 | 8.084<br>(4.58-<br>17.05) | <0.00<br>1 | 6.65<br>(2.11-<br>20.98)  | 0.00<br>1 |
| Experience of Witnessing GBV as a child (n=218)                         |                                |            |                            |      |                           |            |                           |           |
| No                                                                      | Ref                            |            | Ref                        |      | Ref                       |            | Ref                       |           |
| Yes                                                                     | 5.99<br>(3.01-<br>11.57)       | <0.00<br>1 | 1.38 (0.43-<br>4.40)       | 0.58 | 5.18<br>(2.76-<br>9.71)   | <0.00<br>1 | 1.42<br>(0.48-<br>4.20)   | 0.52      |
| Experience of witnessing physical violence as a child                   |                                |            |                            |      |                           |            |                           |           |
| No                                                                      | Ref                            |            | Ref                        |      | Ref                       |            | Ref                       |           |
| Yes                                                                     | 26.14<br>(3.42-<br>199.6<br>0) | 0.002      | 15.29<br>(1.04-<br>223.51) | 0.05 | 8.32<br>(2.65-<br>26.06)  | <0.00<br>1 | 10.11<br>(1.24-<br>82.16) | 0.03      |
| Experience of witnessing sexual violence as a child                     |                                |            |                            |      |                           |            |                           |           |
| No                                                                      | Ref                            |            | Ref                        |      | Ref                       |            | Ref                       |           |
| Yes                                                                     | 35.51<br>(4.70-<br>268.2<br>9) | 0.001      | 6.73 (0.66-<br>68.35)      | 0.11 | 6.68<br>(2.60-<br>18.19)  | 0.00       | 1.007<br>(0.20-<br>4.84)  | 0.99      |

172

173 Almost half (45.3%) of the respondents had experienced GBV in lifetime followed by last 12  
 174 months (35.1%) preceding survey. The lifetime physical, sexual and psychological violence  
 175 among the respondents was 16.89%, 30.22% and 39.56% respectively. Regarding the perpetrators  
 176 of GBV, physical violence was mainly from family members (97%) while sexual violence was  
 177 mainly from non-family members (91%). Less than half (42.15%) of the respondents had reported  
 178 to someone after violence because 38.98% had no idea that was crime 20.33% did not report due  
 179 to fear (**Table 4**).

180 **Table 4: Prevalence of different types of GBV, perpetrators and reporting status after**  
 181 **violence**

| Variables                                         | Frequency | Percentage (%) |
|---------------------------------------------------|-----------|----------------|
| Ever Experienced GBV in lifetime                  |           |                |
| Yes                                               | 102       | 45.3           |
| No                                                | 123       | 54.7           |
| Experienced GBV in last 12 months preceding study |           |                |

|                                             |     |       |
|---------------------------------------------|-----|-------|
| Yes                                         | 79  | 35.1  |
| No                                          | 146 | 64.9  |
| Physical violence                           |     |       |
| Yes                                         | 38  | 16.89 |
| No                                          | 187 | 83.11 |
| Physical Violence in last 12 months (n=38)  |     |       |
| Yes                                         | 14  | 36.8  |
| No                                          | 24  | 63.2  |
| Sexual violence                             |     |       |
| Yes                                         | 68  | 30.22 |
| No                                          | 157 | 69.78 |
| Sexual Violence In last 12 months (n=49)    |     |       |
| Yes                                         | 39  | 57    |
| No                                          | 29  | 43    |
| Emotional violence                          |     |       |
| Yes                                         | 90  | 40    |
| No                                          | 135 | 60    |
| Emotional Violence in last 12 months (n=90) |     |       |
| Yes                                         | 60  | 66.67 |
| No                                          | 30  | 33.33 |
| Perpetrators                                |     |       |
| Physical violence                           |     |       |
| Family member                               | 37  | 97    |
| Non-Family members                          | 1   | 3     |
| Sexual violence                             |     |       |
| Family member                               | 6   | 9     |
| Non-Family members                          | 62  | 91    |
| Emotional violence                          |     |       |
| Family member                               | 37  | 42    |
| Non-Family members                          | 53  | 58    |
| Reporting after Violence (n=102)            |     |       |
| Yes                                         | 43  | 42.15 |
| No                                          | 59  | 57.84 |
| Reasons for not reporting violence (n=59)   |     |       |
| No idea that was crime                      | 23  | 38.98 |
| Scared to report                            | 12  | 20.33 |
| Because of family prestige                  | 11  | 18.64 |
| Embarrassment                               | 7   | 11.86 |
| Accept violence as normal                   | 6   | 10.16 |

182

183

## 184 Discussion

185 To our knowledge, this is the first study to explore the prevalence and factor of GBV among  
186 the secondary school female students in Nepal. This study identified that the risk of GBV including  
187 physical, mental and sexual violence increasing among the secondary school girls where the joint  
188 family status, poor education status of parents, single parents and existence of alcohol or drugs  
189 abusers in the family. Further, GBV among the teenage girls is highly prevalent in both in lifetime  
190 and 12 months prior to the survey.

191 This study identified the higher risk of GBV among the girls who are studying in higher secondary  
192 level, which is supported by the gender gap index 0.659 in 2023.<sup>(12)</sup> In line to our current study  
193 findings, previous studies conducted in Debre Markos Town<sup>(13)</sup>, Nepal<sup>(11)</sup> and Ethiopia<sup>(14)</sup> showed  
194 that the prevalence of GBV among girls was 47%, 48% and 47.2% respectively. However, our  
195 estimates are relatively lower than the study conducted in Southeast Ethiopia (68.2%) and  
196 Northwest Ethiopia (67.7%.4).<sup>(15), (16)</sup> These variations might be due to the difference in status of  
197 women and gender gap.

198 Alike to our study, previous studies conducted in Ethiopia<sup>(17), (14)</sup> and South Africa<sup>(18)</sup> showed that  
199 experience of physical violence among the students were 36.2%, 37.99% and 36.3% respectively.  
200 Further, Nepal demographic health survey (NDHS) 2022 also prevailed that 23% of women aged  
201 15 to 49 have experienced physical violence since age of 15, including 11% experienced physical  
202 violence.<sup>(8)</sup> This survey also highlighted that 37% women of reproductive age experienced physical  
203 violence in Madhesh Province where this study was conducted. In addition, physical violence on  
204 both lifetime and 12 months prior to our study are comparable to the study conducted in Kenya  
205 which were 18.0 and 10.7% respectively.<sup>(19)</sup> The risk of sexual violence is similar to the previous  
206 study conducted in Ethiopia (27.99%).<sup>(14)</sup> In contrast, study in South Africa showed 46%  
207 prevalence of sexual violence.<sup>(18)</sup> The higher prevalence of sexual violence in these studies could  
208 be prevailed because of the different study population who were university students. University  
209 students are more mature than school students to start intimate relationship and have more risk of  
210 sexual violence because of initiation of intimate relationship.<sup>(20)</sup> Furthermore, NDHS 2022 showed  
211 that 8% of women aged 15 to 49 have ever experienced sexual violence, and 4% experienced  
212 sexual violence in the 12 months preceding the survey which was 11% in Madesh province.<sup>(8)</sup> The

213 experience of emotional violence in our current study is lower by 50% compared to the previous  
214 studies in Ethiopia and South Africa.<sup>(17),(18)</sup> However, NDHS reported that the proportion of  
215 women who reported being forced to get married is highest in Madhesh Province (20%), not cared  
216 during illness (11.5%), threatened for divorce (10%) were reported by women of reproductive age  
217 which might be the drivers for the emotional violence.<sup>(8)</sup>

218 Present study found that those respondents who had discriminate between men and women in  
219 family were more at risk of GBV which was supported by a study conducted in Nepal which  
220 showed that a power play between men and women reinforce inequality and increases the  
221 likelihood of violence for women.<sup>(21)</sup> Further, a study conducted in Sub Saharan Africa showed  
222 that having an illiterate mother [OR 2.13] was associated with violence which is similar to the  
223 current study.<sup>(4)</sup> Similarly, respondents whose father had university level of education did not face  
224 GBV with in last 12 months and the risk of GBV was inversely proportional with the education of  
225 father. This finding was supported by a study in Sub-Sharan Africa; having a father who had  
226 completed primary or lower school was three or four times more likely to experience [OR 3.06  
227 and 4.69] sexual violence respectively then compared to father with higher studies.<sup>(22)</sup> This might  
228 be due to mothers with low educational status may be less aware about GBV and unable to teach  
229 their daughter about this issue and protect them while they accept violence as normal process  
230 themselves. There are not much study conducted to examine the childhood exposure to violence  
231 and its factors in Nepalese context. However, one of the largest investigations ever conducted on  
232 childhood trauma the adverse childhood experiences (ACE) study in the US showed that  
233 experience of childhood trauma, separation of parents, substance abusing, experience of domestic  
234 violence are the risk factors of GBV among children which in line to the findings of present  
235 study.<sup>(23)</sup> Similarly, students who witnessed physical violence during childhood was (OR: 15.29,  
236 CI: 1.04-223.51) more likely to feel violence in their life time and also have significant association  
237 with GBV within the last 12 months before the survey ( $p=0.03$ ). In case of experience of witnessing  
238 childhood sexual violence, the risk of GBV was 6.73 (0.66-68.35) times higher than those who did  
239 not witness such violence in childhood.<sup>(23)</sup> A systematic review and meta-analysis in education  
240 institution of Sub-Sharan Africa shows in three studies, researchers found witnessing parental  
241 violence [OR 2.40, 2.20, and 1.54] was associated with an increased risk of GBV.<sup>(22)</sup>  
242 This study showed that the childhood exposure to witnessing violence was 1.38 times more likely  
243 experience GBV in comparison to those who were not exposed to GBV. This finding was

244 supported by the study conducted by Temesgen in Ethiopia which showed that female students  
245 who had witness parental violence were 1.92 times more likely to experience GBV as compared  
246 to those who didn't witness any paternal violence.<sup>(24)</sup> Substance abuse seems as a risk factor of  
247 GBV in this study with risk of 1.88 times among the respondents from family with abuser which  
248 was supported by a study conducted in Ethiopia and Sub-Saharan African.<sup>(22), (23)</sup> This may be due  
249 to alcohol influencing decision making, and person lose their control among themselves which  
250 may lead to GBV. Our study showed that the offenders of physical and sexual violence were  
251 mostly from family members which was in line with the finding previous study which showed  
252 that family members as offenders of physical violence was 50.2% which was 21.2% in case of  
253 sexual violence.<sup>(25)</sup> This might be due to the cultural and traditional belief among family member  
254 that highlighted the importance of existing the strong policy implementation<sup>(26)</sup> and provide  
255 sufficient protection from multiple and intersecting forms of discrimination for women and girls.  
256 Even though the information collector was from local community some respondents may have  
257 underreported their experiences because the issue was sensitive to discuss openly. In addition the  
258 study was conducted in some school among female students only which was not able to address  
259 the issues of children out of school as well as knowledge and perception of male students. So the  
260 findings may not represent the situation of overall children which shows the need of larger level  
261 study by including all mentioned participants.

262 The Constitution of Nepal 2072, gives right to no woman shall be subjected to physical, mental,  
263 sexual, psychological or other form of violence or exploitation.<sup>(27)</sup> Children are future adult and it  
264 is necessary to prevent them from any type of violence because such experiences can have  
265 intergenerational effects. After school students will start intimate relationship and will have their  
266 own family in future which can put them in more risk of violence because major perpetrators of  
267 violence are intimate partners. So school students are required to make aware about the GBV, its  
268 effect in their life and preventive measures because majority of them were not aware that they are  
269 the victim of GBV and it should be reported.

## 270 **Conclusions**

271 In conclusion, GBV including physical, sexual and emotional violence are prevalent among  
272 the female secondary students. The drivers of physical violence were mainly from family members



273 while sexual violence was from non-family members. Joint or extended types of family,  
274 discrimination between the gender within the family, living and education status of parents, and  
275 experience of witnessing violence as a child were main factors associated to the GBV. This  
276 warrants the urgent needs of awareness to the community regarding the female rights for their self-  
277 protection, protection from exposure to GBV since childhood and education on the gender equality  
278 within the family. Further, strong policy implementation to protect the girls from the violence and  
279 proper reporting mechanism through school and other appropriate channel is recommended.

280  
281

## 282 **Acknowledgements**

283 Special thanks to Education officer Mr. Jay Prakash Shah and other teachers who supported  
284 me during data collection as well as all the schools for their support. The support from all the  
285 members of faculty of public health, Manmohan Memorial Institute of Health Sciences is also  
286 appreciative. Above all, cordial thanks to all the respondents for their time without whom this  
287 study would not have been possible.

288

289 **References**

290

291

- 292 1. S. S. Gender-based violence: a crucial challenge for public health. . Kathmandu University  
293 medical journal (KUMJ). 2013;11(42):179-84.
- 294 2. WHO. Violence against women. 2021.
- 295 3. MJ A BA. A Cross Sectional Study on Proportion of Gender Based Violence among  
296 Female College Students in Kottayam District. ADR journals. 2015;1(4).
- 297 4. Rizvi N FA, Pervez S, O Oyebode. Prevalence and Factors Associated with Violence  
298 against Women in Pakistan. Journal of Women's Health and Gynecology. 2019;6:1-3.
- 299 5. E. F. Prevalence, Health Outcomes and Women's Responses to Violence: The Maldives  
300 Study on Women's Health and Life Experiences. . 2006.
- 301 6. Karaev Z CR. End Poverty in South Asia 2018.
- 302 7. NATIONAL WOMEN COMMISSION GON. Baseline Study of Integrated Platform for  
303 Gender Based Violence Prevention and Response 2018.
- 304 8. Services DoH. Nepal Demographic Health Survey. 2022.
- 305 9. Services DoH. Nepal Demographic Health Survey. 2016.
- 306 10. UNFPA. Gender-based Violence in Nepal|: Fact Sheet. Kathmandu, Nepal: UNFPA; 2016.
- 307 11. Nepal Go. A Study on Gender-Based Violence Conducted in Selected Rural Districts of  
308 Nepal. Kathmandu, Nepal: Office of the Prime Minister and Council of Ministers 2012.
- 309 12. Forum WE. Global Gender Gap Report. World Economic Forum 2023.
- 310 13. Ashebir W AA. Associated factors of sexual and gender based violence among female high  
311 school students in Debre Markos Town, North West Ethiopia: an institutionally based cross-  
312 sectional study. Research Gate. 2021.
- 313 14. Mingude AB, Dejene, T.M. . Prevalence and associated factors of gender based violence  
314 among Baso high school female students. *Reprod Health* 2021;18.
- 315 15. Mullu G GA, Amare D, Alebel A, Wagnew F, Tiruneh C et.al. Prevalence of gender based  
316 violence and associated factors among female students of Menkorer high school in Debre Markos  
317 town, Northwest Ethiopia. *Science Journal of Public Health* 2015;3(1):67-74.
- 318 16. Dogiso A SM, Alagaw A, Wassihun B. Prevalence and Associated Factors of Gender-  
319 Based Violence among High School Female Students in Aleta Wondo Town, South East Ethiopia.  
320 . *Ethiopian Journal of Reproductive Health (EJRH)*. 2019;11(2):35-44.
- 321 17. Ferhan Abubeker1 YD, Nega Assefa3, Ayele Geleto , Kristina Adorjan and Tilahun  
322 Abdeta. . Prevalence and Associated Factors of Gender-Based Violence Among Female Students  
323 Attending Private Colleges in Harar Town, Eastern Ethiopia. *The Journal of Health Care  
324 Organization, Provision, and Financing*. 2021;58:1-10.
- 325 18. Mutinta G. Gender-based violence among female students and implicatons for health  
326 intervention programmes in public universities in Eastern Cape, South Africa. *Cogent Social  
327 Sciences*. 2022;8(1).
- 328 19. Parajuli GP CS. Effect of Gender Exploitation and Violence on Health Status of Women  
329 and Girls in Chitwan District. *The Saptagandaki Journal*. 2018;IX:26-33.
- 330 20. al Be. Prevalence and patterns of gender-based violence across adolescent girls and young  
331 women in Mombasa, Kenya. *BMC Women's Health* 2020;20.

- 332 21. Llano-Suárez A, Fernández-Feito, A., García-Díaz, V. et al. Intimate Partner Sexual  
333 Violence Victimization Among Heterosexual Female University Students in Spain: Prevalence  
334 and Polyvictimization. *Sex Res Soc Policy* 2023.
- 335 22. Dahal P, Joshi, S.K. & Swahnberg, K. . A qualitative study on gender inequality and  
336 gender-based violence in Nepal. *BMC Public Health* 2022;22.
- 337 23. Beyene AS CC, Roba HS, Melka AS, Loxton D. Gender-based violence among female  
338 youths in educational institutions of Sub-Saharan Africa: a systematic review and meta-analysis.  
339 *Systematic Reviews*. BMC 2019;8.
- 340 24. Violence NRCoD. Children's Experiences of Gender-Based Violence. An Online Resource  
341 Library on Gender-Based Violence. VAWnet,. An Online Resource Library on Gender-Based  
342 Violence.
- 343 25. al Te. Prevalence and determinants of genderbased violence among high school female  
344 students in Wolaita Sodo, Ethiopia: an institutionally based cross-sectional study. *BMC Public*  
345 *Health* 2020;20.
- 346 26. General D. CEDAW/C/NPL/CO/6 Convention on the Elimination of All Forms of  
347 Discrimination against Women. 2018.
- 348 27. The Constitution of Nepal, (2015).
- 349
